# Supplementary material for: Living with Smoker(s) and Smoking Cessation in Chinese Adult Smokers: Cross-Sectional and Prospective Evidence from Hong Kong Population Health Survey
Source: MDPI journal article supplement (doi:10.3390/ijerph15010074), 2018-01-05
Supplement: s1 [file s1]

**Table S1.** Basic characteristics among 1679 ever smokers at baseline, and among 323 at follow-up (283 continuing and 40 ex-smokers, among 995 daily smokers at baseline excluding 20 occasional smokers and 652 non-respondents at follow-up).

|                                                     |                                         | Baseline |             | Follow-Up |             |
|-----------------------------------------------------|-----------------------------------------|----------|-------------|-----------|-------------|
|                                                     |                                         | <i>n</i> | %           | <i>n</i>  | %           |
| <b>Mean Age (SD)</b>                                |                                         | 1679     | 47.2 (17.0) | 343       | 47.4 (14.1) |
| <b>Sex</b>                                          | Men                                     | 1367     | 81.4        | 301       | 87.8        |
|                                                     | Women                                   | 312      | 18.6        | 43        | 12.2        |
| <b>Place of birth</b>                               | Hong Kong                               | 916      | 54.6        | 167       | 48.7        |
|                                                     | Others                                  | 763      | 45.4        | 176       | 51.3        |
| <b>Education</b>                                    | No formal                               | 86       | 5.1         | 15        | 4.4         |
|                                                     | Primary                                 | 456      | 27.2        | 104       | 30.3        |
|                                                     | Secondary                               | 915      | 54.5        | 200       | 58.3        |
|                                                     | Tertiary                                | 182      | 10.8        | 15        | 4.4         |
|                                                     | Missing                                 | 39       | 2.3         | 9         | 2.6         |
| <b>Personal income</b>                              | No income: no employment                | 132      | 7.9         | 36        | 10.5        |
|                                                     | No income: others                       | 494      | 29.4        | 84        | 24.5        |
|                                                     | <\$10,000                               | 445      | 26.5        | 100       | 29.2        |
|                                                     | \$10,000-19,999                         | 372      | 22.1        | 78        | 22.7        |
|                                                     | ≥\$20,000                               | 140      | 8.3         | 20        | 5.8         |
|                                                     | Not willing to answer                   | 94       | 5.6         | 24        | 7.0         |
|                                                     | Missing                                 | 2        | 0.1         | 1         | 0.3         |
| <b>Smoking</b>                                      | Daily                                   | 995      | 59.3        | 283       | 82.5        |
|                                                     | Occasionally                            | 114      | 6.8         | 20        | 5.8         |
|                                                     | Ex-                                     | 570      | 34.0        | 40        | 11.7        |
| <b>Living with smoker(s)</b>                        | None                                    | 1123     | 66.9        | 239       | 69.7        |
|                                                     | Yes, but they did not smoke inside home | 83       | 4.9         | 4         | 1.2         |
|                                                     | Yes, and they smoked inside home        | 471      | 28.1        | 99        | 28.9        |
|                                                     | Missing                                 | 2        | 0.1         | 1         | 0.3         |
| <b>Secondhand smoke (SHS) exposure at workplace</b> | None                                    | 481      | 28.6        | 76        | 22.2        |
|                                                     | Exposed                                 | 559      | 33.3        | 144       | 42.0        |
|                                                     | Missing                                 | 639      | 38.1        | 220       | 35.9        |
| <b>SHS exposure at other places</b>                 | None                                    | 205      | 12.2        | 25        | 7.3         |
|                                                     | Exposed                                 | 1461     | 87.0        | 318       | 92.7        |
|                                                     | Missing                                 | 13       | 0.8         | 0         | 0           |
